# Supplementary material for: Phytochemical Characterization and Screening of Antioxidant, Antimicrobial and Antiproliferative Properties of Allium × cornutum Clementi and Two Varieties of Allium cepa L. Peel Extracts
Source: MDPI journal article supplement (doi:10.3390/plants10050832), 2021-04-21
Supplement: s1 [file s1]

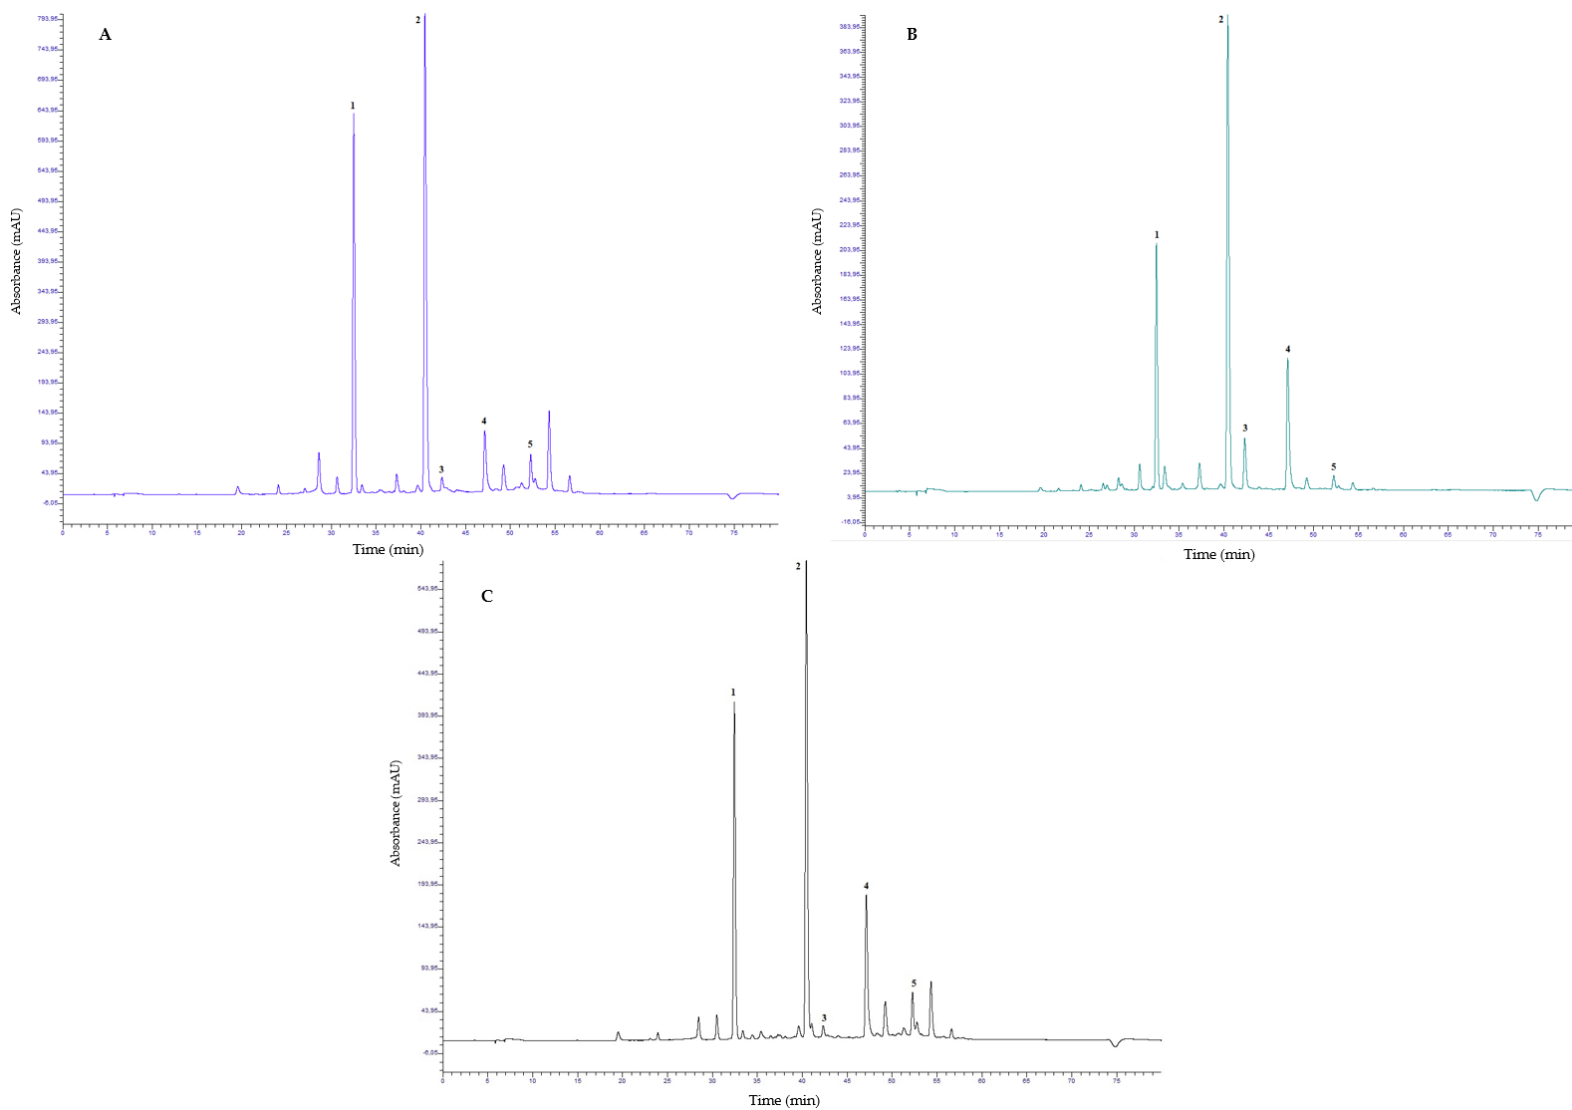

**Figure S1.** High-performance liquid chromatography (HPLC) of methanolic waste extracts of *A. cepa* red variety (**A**), *A. cepa* yellow variety (**B**) and *A. × cornutum* (**C**). Peaks shown are: (1) quercetin 3,4'-diglucoside; (2) quercetin 4'-monoglucoside; (3) myricetin, (4) quercetin aglycone and (5) isorhamnetin. *A. × cornutum* extract was diluted three times.

# **Data S1\_Statistical analysis of HPLC quantification of flavonols and anthocyanins**

Within each row, compare columns (simple effects within rows)

Number of families 13

Number of comparisons per family 3

Alpha 0,05

Tukey's multiple comparisons test Mean Diff, 95,00% CI of diff, Significant? Summary  
Adjusted P Value

## Quercetin 3,4'-diglucoside

A. × cornutum vs. A. cepa (yellow variety) 518,4 518,1 to 518,6 Yes \*\*\*\* <0,0001

A. × cornutum vs. A. cepa (red variety) 286,8 286,6 to 287,1 Yes \*\*\*\* <0,0001

A. cepa (yellow variety) vs. A. cepa (red variety) -231,5 -231,8 to -231,3 Yes \*\*\*\*  
<0,0001

## Quercetin 4'-monoglucoside

A. × cornutum vs. A. cepa (yellow variety) 476,6 476,3 to 476,8 Yes \*\*\*\* <0,0001

A. × cornutum vs. A. cepa (red variety) 318,1 317,9 to 318,4 Yes \*\*\*\* <0,0001

A. cepa (yellow variety) vs. A. cepa (red variety) -158,4 -158,7 to -158,2 Yes \*\*\*\*  
<0,0001

## Myricetin

A. × cornutum vs. A. cepa (yellow variety) 6,250 6,007 to 6,493 Yes \*\*\*\* <0,0001

A. × cornutum vs. A. cepa (red variety) 5,570 5,327 to 5,813 Yes \*\*\*\* <0,0001

A. cepa (yellow variety) vs. A. cepa (red variety) -0,6800 -0,9226 to -0,4374 Yes \*\*\*\*  
<0,0001

## Quercetin aglycone

A. × cornutum vs. A. cepa (yellow variety) 236,7 236,5 to 236,9 Yes \*\*\*\* <0,0001

A. × cornutum vs. A. cepa (red variety) 227,1 226,9 to 227,4 Yes \*\*\*\* <0,0001

A. cepa (yellow variety) vs. A. cepa (red variety) -9,590 -9,833 to -9,347 Yes \*\*\*\*  
<0,0001

#### Isorhamnetin

|                                                    |        |                  |     |      |         |
|----------------------------------------------------|--------|------------------|-----|------|---------|
| A. × cornutum vs. A. cepa (yellow variety)         | 29,86  | 29,62 to 30,10   | Yes | **** | <0,0001 |
| A. × cornutum vs. A. cepa (red variety)            | 18,34  | 18,10 to 18,58   | Yes | **** | <0,0001 |
| A. cepa (yellow variety) vs. A. cepa (red variety) | -11,52 | -11,76 to -11,28 | Yes | **** | <0,0001 |

#### Peonidin 3'-glucoside

|                                                    |             |                   |     |      |         |
|----------------------------------------------------|-------------|-------------------|-----|------|---------|
| A. × cornutum vs. A. cepa (yellow variety)         | -1,110      | -1,353 to -0,8674 | Yes | **** | <0,0001 |
| A. × cornutum vs. A. cepa (red variety)            | -4,263e-014 | -0,2426 to 0,2426 | No  | ns   | >0,9999 |
| A. cepa (yellow variety) vs. A. cepa (red variety) | 1,110       | 0,8674 to 1,353   | Yes | **** | <0,0001 |

#### Peonidin 3'-glucoside acetate

|                                                    |         |                    |     |      |         |
|----------------------------------------------------|---------|--------------------|-----|------|---------|
| A. × cornutum vs. A. cepa (yellow variety)         | 0,000   | -0,2426 to 0,2426  | No  | ns   | >0,9999 |
| A. × cornutum vs. A. cepa (red variety)            | -0,6700 | -0,9126 to -0,4274 | Yes | **** | <0,0001 |
| A. cepa (yellow variety) vs. A. cepa (red variety) | -0,6700 | -0,9126 to -0,4274 | Yes | **** | <0,0001 |

#### Delphinidin 3'-glucoside acetate

|                                                    |        |                    |    |    |         |
|----------------------------------------------------|--------|--------------------|----|----|---------|
| A. × cornutum vs. A. cepa (yellow variety)         | 0,2300 | -0,01257 to 0,4726 | No | ns | 0,0668  |
| A. × cornutum vs. A. cepa (red variety)            | 0,2300 | -0,01257 to 0,4726 | No | ns | 0,0668  |
| A. cepa (yellow variety) vs. A. cepa (red variety) | 0,000  | -0,2426 to 0,2426  | No | ns | >0,9999 |

#### Malvidin 3'-glucoside

|                                            |         |                    |     |      |         |
|--------------------------------------------|---------|--------------------|-----|------|---------|
| A. × cornutum vs. A. cepa (yellow variety) | -0,4800 | -0,7226 to -0,2374 | Yes | **** | <0,0001 |
| A. × cornutum vs. A. cepa (red variety)    | -0,1900 | -0,4326 to 0,05257 | No  | ns   | 0,1538  |

|                                                    |        |                   |     |   |
|----------------------------------------------------|--------|-------------------|-----|---|
| A. cepa (yellow variety) vs. A. cepa (red variety) | 0,2900 | 0,04743 to 0,5326 | Yes | * |
|----------------------------------------------------|--------|-------------------|-----|---|

Cyanidin 3'-glucoside

|                                                    |        |                    |     |      |         |
|----------------------------------------------------|--------|--------------------|-----|------|---------|
| A. × cornutum vs. A. cepa (yellow variety)         | -7,530 | -7,773 to -7,287   | Yes | **** | <0,0001 |
| A. × cornutum vs. A. cepa (red variety)            | 0,2100 | -0,03257 to 0,4526 | No  | ns   | 0,1031  |
| A. cepa (yellow variety) vs. A. cepa (red variety) | 7,740  | 7,497 to 7,983     | Yes | **** | <0,0001 |

Cyanidin 3'-glucoside acetate

|                                                    |        |                  |     |      |         |
|----------------------------------------------------|--------|------------------|-----|------|---------|
| A. × cornutum vs. A. cepa (yellow variety)         | 0,4600 | 0,2174 to 0,7026 | Yes | **** | <0,0001 |
| A. × cornutum vs. A. cepa (red variety)            | -2,220 | -2,463 to -1,977 | Yes | **** | <0,0001 |
| A. cepa (yellow variety) vs. A. cepa (red variety) | -2,680 | -2,923 to -2,437 | Yes | **** | <0,0001 |

Petunidin 3'-glucoside

|                                                    |         |                   |    |    |         |
|----------------------------------------------------|---------|-------------------|----|----|---------|
| A. × cornutum vs. A. cepa (yellow variety)         | -0,1200 | -0,3626 to 0,1226 | No | ns | 0,4674  |
| A. × cornutum vs. A. cepa (red variety)            | 0,000   | -0,2426 to 0,2426 | No | ns | >0,9999 |
| A. cepa (yellow variety) vs. A. cepa (red variety) | 0,1200  | -0,1226 to 0,3626 | No | ns | 0,4674  |

Petunidin 3'-glucoside acetate

|                                                    |         |                    |    |    |         |
|----------------------------------------------------|---------|--------------------|----|----|---------|
| A. × cornutum vs. A. cepa (yellow variety)         | 0,000   | -0,2426 to 0,2426  | No | ns | >0,9999 |
| A. × cornutum vs. A. cepa (red variety)            | -0,1700 | -0,4126 to 0,07257 | No | ns | 0,2215  |
| A. cepa (yellow variety) vs. A. cepa (red variety) | -0,1700 | -0,4126 to 0,07257 | No | ns | 0,2215  |

|              |        |        |                           |    |   |    |
|--------------|--------|--------|---------------------------|----|---|----|
| Test details | Mean 1 | Mean 2 | Mean Diff, SE of diff, N1 | N2 | q | DF |
|--------------|--------|--------|---------------------------|----|---|----|

Quercetin 3,4'-diglucoside

|                                                    |                          |        |      |       |       |
|----------------------------------------------------|--------------------------|--------|------|-------|-------|
| A. × cornutum vs. A. cepa (yellow variety)         | 618,8 100,4 518,4 0,1015 | 1      | 1    | 7220  | 78,00 |
| A. × cornutum vs. A. cepa (red variety)            | 618,8 331,9 286,8 0,1015 | 1      | 3995 | 78,00 |       |
| A. cepa (yellow variety) vs. A. cepa (red variety) | 100,4 331,9 -231,5       | 0,1015 | 1    | 1     |       |
| 3225                                               | 78,00                    |        |      |       |       |

#### Quercetin 4'-monoglucoside

|                                                    |                          |        |      |       |       |
|----------------------------------------------------|--------------------------|--------|------|-------|-------|
| A. × cornutum vs. A. cepa (yellow variety)         | 617,0 140,4 476,6 0,1015 | 1      | 1    | 6639  | 78,00 |
| A. × cornutum vs. A. cepa (red variety)            | 617,0 298,9 318,1 0,1015 | 1      | 4432 | 78,00 |       |
| A. cepa (yellow variety) vs. A. cepa (red variety) | 140,4 298,9 -158,4       | 0,1015 | 1    | 1     |       |
| 2207                                               | 78,00                    |        |      |       |       |

#### Myricetin

|                                                    |                          |        |       |       |       |
|----------------------------------------------------|--------------------------|--------|-------|-------|-------|
| A. × cornutum vs. A. cepa (yellow variety)         | 14,88 8,630 6,250 0,1015 | 1      | 1     | 87,06 | 78,00 |
| A. × cornutum vs. A. cepa (red variety)            | 14,88 9,310 5,570 0,1015 | 1      | 77,59 | 78,00 |       |
| A. cepa (yellow variety) vs. A. cepa (red variety) | 8,630 9,310 -0,6800      | 0,1015 | 1     | 1     |       |
| 9,472                                              | 78,00                    |        |       |       |       |

#### Quercetin aglycone

|                                                    |                          |        |      |       |       |
|----------------------------------------------------|--------------------------|--------|------|-------|-------|
| A. × cornutum vs. A. cepa (yellow variety)         | 297,2 60,51 236,7 0,1015 | 1      | 1    | 3297  | 78,00 |
| A. × cornutum vs. A. cepa (red variety)            | 297,2 70,10 227,1 0,1015 | 1      | 3164 | 78,00 |       |
| A. cepa (yellow variety) vs. A. cepa (red variety) | 60,51 70,10 -9,590       | 0,1015 | 1    | 1     |       |
| 133,6                                              | 78,00                    |        |      |       |       |

#### Isorhamnetin

|                                                    |                          |        |       |       |       |
|----------------------------------------------------|--------------------------|--------|-------|-------|-------|
| A. × cornutum vs. A. cepa (yellow variety)         | 32,07 2,210 29,86 0,1015 | 1      | 1     | 415,9 | 78,00 |
| A. × cornutum vs. A. cepa (red variety)            | 32,07 13,73 18,34 0,1015 | 1      | 255,5 | 78,00 |       |
| A. cepa (yellow variety) vs. A. cepa (red variety) | 2,210 13,73 -11,52       | 0,1015 | 1     | 1     |       |
| 160,5                                              | 78,00                    |        |       |       |       |

#### Peonidin 3'-glucoside

|                                                    |                                      |        |   |       |  |
|----------------------------------------------------|--------------------------------------|--------|---|-------|--|
| A. × cornutum vs. A. cepa (yellow variety)         | -4,263e-014 1,110 -1,110             | 0,1015 | 1 | 1     |  |
| 15,46                                              | 78,00                                |        |   |       |  |
| A. × cornutum vs. A. cepa (red variety)            | -4,263e-014 0,000 -4,263e-014 0,1015 | 1      | 1 |       |  |
| 5,938e-013                                         | 78,00                                |        |   |       |  |
| A. cepa (yellow variety) vs. A. cepa (red variety) | 1,110 0,000 1,110 0,1015             | 1      | 1 | 15,46 |  |
| 78,00                                              |                                      |        |   |       |  |

#### Peonidin 3'-glucoside acetate

|                                                    |       |        |         |        |   |   |       |       |
|----------------------------------------------------|-------|--------|---------|--------|---|---|-------|-------|
| A. × cornutum vs. A. cepa (yellow variety)         | 0,000 | 0,000  | 0,000   | 0,1015 | 1 | 1 | 0,000 | 78,00 |
| A. × cornutum vs. A. cepa (red variety)            | 0,000 | 0,6700 | -0,6700 | 0,1015 | 1 | 1 | 9,333 | 78,00 |
| A. cepa (yellow variety) vs. A. cepa (red variety) | 0,000 | 0,6700 | -0,6700 | 0,1015 | 1 |   |       |       |
| 1                                                  | 9,333 | 78,00  |         |        |   |   |       |       |

Delphinidin 3'-glucoside acetate

|                                                    |        |       |        |        |   |   |       |       |
|----------------------------------------------------|--------|-------|--------|--------|---|---|-------|-------|
| A. × cornutum vs. A. cepa (yellow variety)         | 0,2300 | 0,000 | 0,2300 | 0,1015 | 1 | 1 |       |       |
| 3,204                                              | 78,00  |       |        |        |   |   |       |       |
| A. × cornutum vs. A. cepa (red variety)            | 0,2300 | 0,000 | 0,2300 | 0,1015 | 1 | 1 | 3,204 | 78,00 |
| A. cepa (yellow variety) vs. A. cepa (red variety) | 0,000  | 0,000 | 0,000  | 0,1015 | 1 | 1 | 0,000 | 78,00 |

Malvidin 3'-glucoside

|                                                    |         |        |         |        |   |   |  |  |
|----------------------------------------------------|---------|--------|---------|--------|---|---|--|--|
| A. × cornutum vs. A. cepa (yellow variety)         | 0,05000 | 0,5300 | -0,4800 | 0,1015 | 1 |   |  |  |
| 1                                                  | 6,686   | 78,00  |         |        |   |   |  |  |
| A. × cornutum vs. A. cepa (red variety)            | 0,05000 | 0,2400 | -0,1900 | 0,1015 | 1 | 1 |  |  |
| 2,647                                              | 78,00   |        |         |        |   |   |  |  |
| A. cepa (yellow variety) vs. A. cepa (red variety) | 0,5300  | 0,2400 | 0,2900  | 0,1015 |   |   |  |  |
| 1                                                  | 1       | 4,040  | 78,00   |        |   |   |  |  |

Cyanidin 3'-glucoside

|                                                    |        |        |        |        |   |   |  |  |
|----------------------------------------------------|--------|--------|--------|--------|---|---|--|--|
| A. × cornutum vs. A. cepa (yellow variety)         | 0,3200 | 7,850  | -7,530 | 0,1015 | 1 | 1 |  |  |
| 104,9                                              | 78,00  |        |        |        |   |   |  |  |
| A. × cornutum vs. A. cepa (red variety)            | 0,3200 | 0,1100 | 0,2100 | 0,1015 | 1 | 1 |  |  |
| 2,925                                              | 78,00  |        |        |        |   |   |  |  |
| A. cepa (yellow variety) vs. A. cepa (red variety) | 7,850  | 0,1100 | 7,740  | 0,1015 | 1 | 1 |  |  |
| 107,8                                              | 78,00  |        |        |        |   |   |  |  |

Cyanidin 3'-glucoside acetate

|                                                    |        |        |        |        |   |   |       |       |
|----------------------------------------------------|--------|--------|--------|--------|---|---|-------|-------|
| A. × cornutum vs. A. cepa (yellow variety)         | 1,220  | 0,7600 | 0,4600 | 0,1015 | 1 | 1 |       |       |
| 6,408                                              | 78,00  |        |        |        |   |   |       |       |
| A. × cornutum vs. A. cepa (red variety)            | 1,220  | 3,440  | -2,220 | 0,1015 | 1 | 1 | 30,92 | 78,00 |
| A. cepa (yellow variety) vs. A. cepa (red variety) | 0,7600 | 3,440  | -2,680 | 0,1015 |   |   | 1     |       |
| 1                                                  | 37,33  | 78,00  |        |        |   |   |       |       |

Petunidin 3'-glucoside

|                                                    |                          |              |        |             |   |
|----------------------------------------------------|--------------------------|--------------|--------|-------------|---|
| A. × cornutum vs. A. cepa (yellow variety)         | 0,000 0,1200             | -0,1200      | 0,1015 | 1           | 1 |
| 1,672 78,00                                        |                          |              |        |             |   |
| A. × cornutum vs. A. cepa (red variety)            | 0,000 0,000 0,000 0,1015 | 1            | 1      | 0,000 78,00 |   |
| A. cepa (yellow variety) vs. A. cepa (red variety) | 0,1200                   | 0,000 0,1200 | 0,1015 | 1           |   |
| 1 1,672 78,00                                      |                          |              |        |             |   |

Petunidin 3'-glucoside acetate

|                                                    |                          |         |        |             |               |
|----------------------------------------------------|--------------------------|---------|--------|-------------|---------------|
| A. × cornutum vs. A. cepa (yellow variety)         | 0,000 0,000 0,000 0,1015 | 1       | 1      | 0,000 78,00 |               |
| A. × cornutum vs. A. cepa (red variety)            | 0,000 0,1700             | -0,1700 | 0,1015 | 1           | 1 2,368 78,00 |
| A. cepa (yellow variety) vs. A. cepa (red variety) | 0,000 0,1700             | -0,1700 | 0,1015 | 1           |               |
| 1 2,368 78,00                                      |                          |         |        |             |               |

## Data S2\_Statistical analysis of antioxidant activity

Within each row, compare columns (simple effects within rows)

Number of families 2  
 Number of comparisons per family 3  
 Alpha 0,05

Šídák's multiple comparisons test Mean Diff, 95,00% CI of diff, Below threshold? Summary  
 Adjusted P Value

### ORAC (Trolox eq)

|                                                    |                      |     |      |         |
|----------------------------------------------------|----------------------|-----|------|---------|
| A. × cornutum vs. A. cepa (yellow variety)         | 7,520 2,526 to 12,51 | Yes | **   | 0,0039  |
| A. × cornutum vs. A. cepa (red variety)            | 15,86 10,87 to 20,85 | Yes | **** | <0,0001 |
| A. cepa (yellow variety) vs. A. cepa (red variety) | 8,340 3,346 to 13,33 | Yes | **   | 0,0018  |

### DPPH (% inhibition)

|                                                    |                      |     |      |         |
|----------------------------------------------------|----------------------|-----|------|---------|
| A. × cornutum vs. A. cepa (yellow variety)         | 16,42 11,43 to 21,41 | Yes | **** | <0,0001 |
| A. × cornutum vs. A. cepa (red variety)            | 28,75 23,76 to 33,74 | Yes | **** | <0,0001 |
| A. cepa (yellow variety) vs. A. cepa (red variety) | 12,33 7,336 to 17,32 | Yes | **** | <0,0001 |

| Test details                                       | Mean 1 | Mean 2 | Mean Diff, | SE of diff, | N1 | N2 | t     | DF    |
|----------------------------------------------------|--------|--------|------------|-------------|----|----|-------|-------|
| ORAC (Trolox eq)                                   |        |        |            |             |    |    |       |       |
| A. × cornutum vs. A. cepa (yellow variety)         | 20,50  | 12,98  | 7,520      | 1,803       | 3  | 3  | 4,172 | 12,00 |
| A. × cornutum vs. A. cepa (red variety)            | 20,50  | 4,640  | 15,86      | 1,803       | 3  | 3  | 8,798 | 12,00 |
| A. cepa (yellow variety) vs. A. cepa (red variety) | 12,98  | 4,640  | 8,340      | 1,803       | 3  | 3  | 4,626 | 12,00 |
| DPPH (% inhibition)                                |        |        |            |             |    |    |       |       |
| A. × cornutum vs. A. cepa (yellow variety)         | 82,18  | 65,76  | 16,42      | 1,803       | 3  | 3  | 9,109 | 12,00 |
| A. × cornutum vs. A. cepa (red variety)            | 82,18  | 53,43  | 28,75      | 1,803       | 3  | 3  | 15,95 | 12,00 |
| A. cepa (yellow variety) vs. A. cepa (red variety) | 65,76  | 53,43  | 12,33      | 1,803       | 3  | 3  | 6,840 | 12,00 |



### Data S3\_Statistical analysis of antiproliferative activity of onion waste extracts

Within each row, compare columns (simple effects within rows)

Number of families 3  
 Number of comparisons per family 3  
 Alpha 0,05

Tukey's multiple comparisons test Mean Diff, 95,00% CI of diff, Below threshold? Summary  
 Adjusted P Value

#### HeLa

|                                                    |        |                 |    |    |        |
|----------------------------------------------------|--------|-----------------|----|----|--------|
| A. × cornutum vs. A. cepa (red variety)            | -3,435 | -11,52 to 4,648 | No | ns | 0,4897 |
| A. × cornutum vs. A. cepa (yellow variety)         | -2,765 | -10,85 to 5,318 | No | ns | 0,6214 |
| A. cepa (red variety) vs. A. cepa (yellow variety) | 0,6700 | -7,413 to 8,753 | No | ns | 0,9710 |

#### HCT116

|                                                    |        |                 |    |    |        |
|----------------------------------------------------|--------|-----------------|----|----|--------|
| A. × cornutum vs. A. cepa (red variety)            | 0,4550 | -7,628 to 8,538 | No | ns | 0,9865 |
| A. × cornutum vs. A. cepa (yellow variety)         | -5,880 | -13,96 to 2,203 | No | ns | 0,1603 |
| A. cepa (red variety) vs. A. cepa (yellow variety) | -6,335 | -14,42 to 1,748 | No | ns | 0,1268 |

#### U2OS

|                                                    |        |                 |    |    |        |
|----------------------------------------------------|--------|-----------------|----|----|--------|
| A. × cornutum vs. A. cepa (red variety)            | 0,4197 | -7,664 to 8,503 | No | ns | 0,9885 |
| A. × cornutum vs. A. cepa (yellow variety)         | -1,353 | -9,436 to 6,731 | No | ns | 0,8881 |
| A. cepa (red variety) vs. A. cepa (yellow variety) | -1,773 | -9,856 to 6,311 | No | ns | 0,8172 |

| Test details | Mean 1 | Mean 2 | Mean Diff, SE of diff, N1 | N2 | q | DF |
|--------------|--------|--------|---------------------------|----|---|----|
|--------------|--------|--------|---------------------------|----|---|----|

# HeLa

|                                                    |        |       |        |       |   |   |       |       |
|----------------------------------------------------|--------|-------|--------|-------|---|---|-------|-------|
| A. × cornutum vs. A. cepa (red variety)            | 21,04  | 24,48 | -3,435 | 2,895 | 2 | 2 | 1,678 | 9,000 |
| A. × cornutum vs. A. cepa (yellow variety)         | 21,04  | 23,81 | -2,765 | 2,895 | 2 | 2 | 1,351 | 9,000 |
| A. cepa (red variety) vs. A. cepa (yellow variety) | 24,48  | 23,81 | 0,6700 | 2,895 | 2 | 2 |       |       |
|                                                    | 0,3273 | 9,000 |        |       |   |   |       |       |

# HCT116

|                                                    |       |       |        |       |   |   |        |       |
|----------------------------------------------------|-------|-------|--------|-------|---|---|--------|-------|
| A. × cornutum vs. A. cepa (red variety)            | 30,40 | 29,94 | 0,4550 | 2,895 | 2 | 2 | 0,2223 | 9,000 |
| A. × cornutum vs. A. cepa (yellow variety)         | 30,40 | 36,28 | -5,880 | 2,895 | 2 | 2 | 2,872  | 9,000 |
| A. cepa (red variety) vs. A. cepa (yellow variety) | 29,94 | 36,28 | -6,335 | 2,895 | 2 | 2 | 3,094  |       |
|                                                    | 9,000 |       |        |       |   |   |        |       |

# U2OS

|                                                    |        |       |        |       |   |   |        |       |
|----------------------------------------------------|--------|-------|--------|-------|---|---|--------|-------|
| A. × cornutum vs. A. cepa (red variety)            | 25,40  | 24,98 | 0,4197 | 2,895 | 2 | 2 | 0,2050 | 9,000 |
| A. × cornutum vs. A. cepa (yellow variety)         | 25,40  | 26,75 | -1,353 | 2,895 | 2 | 2 | 0,6608 |       |
|                                                    | 9,000  |       |        |       |   |   |        |       |
| A. cepa (red variety) vs. A. cepa (yellow variety) | 24,98  | 26,75 | -1,773 | 2,895 | 2 | 2 |        |       |
|                                                    | 0,8658 | 9,000 |        |       |   |   |        |       |

#### Data S4\_Statistical analysis of antiproliferative activity of quercetin conjugates

Compare each cell mean with the other cell mean in that row

Number of families 1

Number of comparisons per family 3

Alpha 0,05

Šídák's multiple comparisons test Mean Diff, 95,00% CI of diff, Below threshold? Summary  
Adjusted P Value

quercetin 4'-monoglucoside - quercetin 3,4'-diglucoside  
HeLa -225,2 -229,6 to -220,8 Yes \*\*\*\* <0,0001  
HCT116 -13,07 -17,44 to -8,690 Yes \*\*\* 0,0002  
U2OS -50,60 -54,97 to -46,22 Yes \*\*\*\* <0,0001

| Test details                                            | Mean 1 | Mean 2 | Mean Diff, | SE of diff, | N1 | N2 | t     | DF    |
|---------------------------------------------------------|--------|--------|------------|-------------|----|----|-------|-------|
| quercetin 4'-monoglucoside - quercetin 3,4'-diglucoside |        |        |            |             |    |    |       |       |
| HeLa                                                    | 95,12  | 320,3  | -225,2     | 1,336       | 2  | 2  | 168,5 | 6,000 |
| HCT116                                                  | 104,2  | 117,3  | -13,07     | 1,336       | 2  | 2  | 9,778 | 6,000 |
| U2OS                                                    | 106,9  | 157,4  | -50,60     | 1,336       | 2  | 2  | 37,86 | 6,000 |

# Data S5\_Statistical analysis of antiproliferative activity of A. x cornutum after digestion

Within each row, compare columns (simple effects within rows)

Number of families 3  
Number of comparisons per family 3  
Alpha 0,05

Dunnett's multiple comparisons test      Mean Diff, 95,00% CI of diff,      Below threshold? Summary  
Adjusted P Value

## Hela

|                   |                      |                 |    |    |        |
|-------------------|----------------------|-----------------|----|----|--------|
| Undigested vs. OF | -1,335               | -5,980 to 3,310 | No | ns | 0,7840 |
| Undigested vs. GF | -0,2750              | -4,920 to 4,370 | No | ns | 0,9971 |
| Undigested vs. IF | 5,850 1,205 to 10,50 | Yes             | *  |    | 0,0143 |

## HCT116

|                   |                       |                 |    |    |        |
|-------------------|-----------------------|-----------------|----|----|--------|
| Undigested vs. OF | 0,4300                | -4,215 to 5,075 | No | ns | 0,9890 |
| Undigested vs. GF | -3,050                | -7,695 to 1,595 | No | ns | 0,2352 |
| Undigested vs. IF | 5,545 0,8996 to 10,19 | Yes             | *  |    | 0,0197 |

## U2OS

|                   |                       |                 |    |    |        |
|-------------------|-----------------------|-----------------|----|----|--------|
| Undigested vs. OF | 0,8350                | -3,810 to 5,480 | No | ns | 0,9303 |
| Undigested vs. GF | 0,5400                | -4,105 to 5,185 | No | ns | 0,9789 |
| Undigested vs. IF | 5,185 0,5396 to 9,830 | Yes             | *  |    | 0,0286 |

| Test details | Mean 1 | Mean 2 | Mean Diff, | SE of diff, N1 | N2 | q | DF |
|--------------|--------|--------|------------|----------------|----|---|----|
|--------------|--------|--------|------------|----------------|----|---|----|

## Hela

|                   |       |       |               |         |       |        |       |
|-------------------|-------|-------|---------------|---------|-------|--------|-------|
| Undigested vs. OF | 23,77 | 25,10 | -1,335        | 1,731 2 | 2     | 0,7710 | 12,00 |
| Undigested vs. GF | 23,77 | 24,04 | -0,2750       | 1,731 2 | 2     | 0,1588 | 12,00 |
| Undigested vs. IF | 23,77 | 17,92 | 5,850 1,731 2 | 2       | 3,379 | 12,00  |       |

## HCT116

|                   |       |       |               |         |       |        |       |
|-------------------|-------|-------|---------------|---------|-------|--------|-------|
| Undigested vs. OF | 32,77 | 32,34 | 0,4300        | 1,731 2 | 2     | 0,2483 | 12,00 |
| Undigested vs. GF | 32,77 | 35,82 | -3,050        | 1,731 2 | 2     | 1,762  | 12,00 |
| Undigested vs. IF | 32,77 | 27,23 | 5,545 1,731 2 | 2       | 3,202 | 12,00  |       |

U2OS

|                   |       |       |        |       |   |   |        |       |
|-------------------|-------|-------|--------|-------|---|---|--------|-------|
| Undigested vs. OF | 33,14 | 32,31 | 0,8350 | 1,731 | 2 | 2 | 0,4822 | 12,00 |
| Undigested vs. GF | 33,14 | 32,60 | 0,5400 | 1,731 | 2 | 2 | 0,3119 | 12,00 |
| Undigested vs. IF | 33,14 | 27,96 | 5,185  | 1,731 | 2 | 2 | 2,995  | 12,00 |

# **Data S6\_Statistical analysis of antiproliferative activity of A. cepa (yellow variety) after digestion**

Within each row, compare columns (simple effects within rows)

Number of families 3  
 Number of comparisons per family 3  
 Alpha 0,05

Dunnett's multiple comparisons test      Mean Diff, 95,00% CI of diff,      Below threshold? Summary  
 Adjusted P Value

Hela

|                   |         |                 |     |    |        |
|-------------------|---------|-----------------|-----|----|--------|
| Undigested vs. OF | -0,1950 | -4,209 to 3,819 | No  | ns | 0,9983 |
| Undigested vs. GF | 0,6550  | -3,359 to 4,669 | No  | ns | 0,9460 |
| Undigested vs. IF | 6,610   | 2,596 to 10,62  | Yes | ** | 0,0023 |

HCT116

|                   |         |                 |     |     |        |
|-------------------|---------|-----------------|-----|-----|--------|
| Undigested vs. OF | -0,4600 | -4,474 to 3,554 | No  | ns  | 0,9797 |
| Undigested vs. GF | -2,455  | -6,469 to 1,559 | No  | ns  | 0,2819 |
| Undigested vs. IF | 8,670   | 4,656 to 12,68  | Yes | *** | 0,0003 |

U2OS

|                   |         |                 |     |    |         |
|-------------------|---------|-----------------|-----|----|---------|
| Undigested vs. OF | 0,02000 | -3,994 to 4,034 | No  | ns | >0,9999 |
| Undigested vs. GF | -1,200  | -5,214 to 2,814 | No  | ns | 0,7648  |
| Undigested vs. IF | 4,455   | 0,4414 to 8,469 | Yes | *  | 0,0295  |

| Test details | Mean 1 | Mean 2 | Mean Diff, | SE of diff, | N1 | N2 | q | DF |
|--------------|--------|--------|------------|-------------|----|----|---|----|
|--------------|--------|--------|------------|-------------|----|----|---|----|

Hela

|                   |       |       |         |       |   |   |        |       |
|-------------------|-------|-------|---------|-------|---|---|--------|-------|
| Undigested vs. OF | 25,00 | 25,19 | -0,1950 | 1,496 | 2 | 2 | 0,1303 | 12,00 |
| Undigested vs. GF | 25,00 | 24,34 | 0,6550  | 1,496 | 2 | 2 | 0,4378 | 12,00 |
| Undigested vs. IF | 25,00 | 18,39 | 6,610   | 1,496 | 2 | 2 | 4,418  | 12,00 |

HCT116

|                   |       |       |         |       |   |   |        |       |
|-------------------|-------|-------|---------|-------|---|---|--------|-------|
| Undigested vs. OF | 37,92 | 38,38 | -0,4600 | 1,496 | 2 | 2 | 0,3075 | 12,00 |
| Undigested vs. GF | 37,92 | 40,37 | -2,455  | 1,496 | 2 | 2 | 1,641  | 12,00 |
| Undigested vs. IF | 37,92 | 29,25 | 8,670   | 1,496 | 2 | 2 | 5,795  | 12,00 |

U2OS

|                   |       |       |         |       |   |   |         |       |
|-------------------|-------|-------|---------|-------|---|---|---------|-------|
| Undigested vs. OF | 36,91 | 36,89 | 0,02000 | 1,496 | 2 | 2 | 0,01337 | 12,00 |
| Undigested vs. GF | 36,91 | 38,11 | -1,200  | 1,496 | 2 | 2 | 0,8021  | 12,00 |
| Undigested vs. IF | 36,91 | 32,45 | 4,455   | 1,496 | 2 | 2 | 2,978   | 12,00 |

# **Data S7\_Statistical analysis of antiproliferative activity of A. cepa (red variety) after digestion**

Within each row, compare columns (simple effects within rows)

Number of families 3  
 Number of comparisons per family 3  
 Alpha 0,05

Dunnett's multiple comparisons test      Mean Diff, 95,00% CI of diff,      Below threshold? Summary  
 Adjusted P Value

Hela

|                   |                      |                 |     |    |        |
|-------------------|----------------------|-----------------|-----|----|--------|
| Undigested vs. OF | -1,145               | -4,251 to 1,961 | No  | ns | 0,6449 |
| Undigested vs. GF | -1,075               | -4,181 to 2,031 | No  | ns | 0,6842 |
| Undigested vs. IF | 6,960 3,854 to 10,07 | Yes             | *** |    | 0,0002 |

HCT116

|                   |                      |                 |    |    |         |
|-------------------|----------------------|-----------------|----|----|---------|
| Undigested vs. OF | 0,01000              | -3,096 to 3,116 | No | ns | >0,9999 |
| Undigested vs. GF | -2,025               | -5,131 to 1,081 | No | ns | 0,2396  |
| Undigested vs. IF | 4,275 1,169 to 7,381 | Yes             | ** |    | 0,0081  |

U2OS

|                   |                      |                 |     |    |        |
|-------------------|----------------------|-----------------|-----|----|--------|
| Undigested vs. OF | 0,1150               | -2,991 to 3,221 | No  | ns | 0,9993 |
| Undigested vs. GF | 0,5950               | -2,511 to 3,701 | No  | ns | 0,9179 |
| Undigested vs. IF | 5,675 2,569 to 8,781 | Yes             | *** |    | 0,0010 |

| Test details | Mean 1 | Mean 2 | Mean Diff, | SE of diff, | N1 | N2 | q | DF |
|--------------|--------|--------|------------|-------------|----|----|---|----|
|--------------|--------|--------|------------|-------------|----|----|---|----|

Hela

|                   |       |       |        |       |   |   |        |       |
|-------------------|-------|-------|--------|-------|---|---|--------|-------|
| Undigested vs. OF | 26,11 | 27,25 | -1,145 | 1,158 | 2 | 2 | 0,9891 | 12,00 |
| Undigested vs. GF | 26,11 | 27,18 | -1,075 | 1,158 | 2 | 2 | 0,9287 | 12,00 |
| Undigested vs. IF | 26,11 | 19,15 | 6,960  | 1,158 | 2 | 2 | 6,013  | 12,00 |

HCT116

|                   |       |       |         |       |   |   |          |       |
|-------------------|-------|-------|---------|-------|---|---|----------|-------|
| Undigested vs. OF | 29,92 | 29,91 | 0,01000 | 1,158 | 2 | 2 | 0,008639 | 12,00 |
| Undigested vs. GF | 29,92 | 31,94 | -2,025  | 1,158 | 2 | 2 | 1,749    | 12,00 |
| Undigested vs. IF | 29,92 | 25,64 | 4,275   | 1,158 | 2 | 2 | 3,693    | 12,00 |



U2OS

|                   |       |       |        |       |   |   |         |       |
|-------------------|-------|-------|--------|-------|---|---|---------|-------|
| Undigested vs. OF | 32,42 | 32,30 | 0,1150 | 1,158 | 2 | 2 | 0,09935 | 12,00 |
| Undigested vs. GF | 32,42 | 31,82 | 0,5950 | 1,158 | 2 | 2 | 0,5140  | 12,00 |
| Undigested vs. IF | 32,42 | 26,74 | 5,675  | 1,158 | 2 | 2 | 4,903   | 12,00 |

**Data S8-1:** Quality parameters of the optimized HPLC for flavonol quantification (n = 6).

| Flavonols                     | Quercetin calibration range (mg/L) | r <sup>2</sup> |
|-------------------------------|------------------------------------|----------------|
| (1) Quercetin 3,4-diglucoside | 2.48-158.40                        | 0.999981       |
| (2) Quercetin 4-monoglucoside | 1.88-120                           | 0.999990       |
| (3) Quercetin                 | 2.11-135.1                         | 0.999841       |
| (4) Isorhamnetin              | 0.66-42.46                         | 0.999967       |
| (5) Myricetin                 | 0.58-36.8                          | 0.999968       |
| (6) Kaempferol                | 0.41-26.28                         | 0.999926       |

**Data S8-2:** Stability data. detection and quantification limits of 5 flavonoid standards analyzed by HPLC

| Component name                | Time [min] | Area [Uv*sec] | Area [%] | LOD (µg/ml) | LOQ (µg/mL) |
|-------------------------------|------------|---------------|----------|-------------|-------------|
| (1) quercetin 3,4-diglucoside | 33.322     | 19564.66      | 24.33    | 0.133       | 0.339       |
| (2) quercetin 4-monoglucoside | 41.471     | 23154.07      | 28.79    | 0.07        | 0.21        |
| (3) quercetin                 | 48.185     | 24298.08      | 30.22    | 0.038       | 0.114       |
| (4) isorhamnetin              | 52.933     | 4323.8        | 5.38     | 0.081       | 0.243       |
| (5) kaempferol                | 52.24      | 9072.13       | 11.28    | 0.032       | 0.096       |

**Data S8-3:** Stability data. detection and quantification limits of four anthocyanins standard analysed by HPLC

| Anthocyanins                | Retention time (min) | Area (counts) | Result   | LOD (µg/ml) | LOQ (µg/ml) |
|-----------------------------|----------------------|---------------|----------|-------------|-------------|
| (1) Malvidin 3-glucoside    | 13.808               | 10731967      | 22.4944  | 0.032       | 0.066       |
| (2) Cyanidin 3-glucoside    | 8.605                | 2222866       | 164.8706 |             |             |
| (3) Petunidin 3-glucoside   | 10.072               | 2789539       | 684.6994 |             |             |
| (4) Delphinidin 3-glucoside | 19.907               | 98032         | 70.8784  |             |             |

**Data S8-4:** Quality parameters of the optimized HPLC for anthocyanin quantification (n = 1)

| Flavonols                | Malvidin 3-glucoside calibration range (mg/L) | r <sup>2</sup> |
|--------------------------|-----------------------------------------------|----------------|
| (1) Malvidin 3-glucoside | 0.208-100                                     | 0.9993         |

**Table S1.** Preparation of stock solutions of stimulated digestive fluids.

| Compound                                                                                        | Stock concentration |       | SSF                  | SGF                  | SIF                  |
|-------------------------------------------------------------------------------------------------|---------------------|-------|----------------------|----------------------|----------------------|
|                                                                                                 |                     |       | pH 7.0               | pH 3.0               | pH 7.0               |
|                                                                                                 |                     |       | Concentration in SSF | Concentration in SGF | Concentration in SIF |
|                                                                                                 | g/l                 | mol/l | mmol/l               | mmol/l               | mmol/l               |
| KCl                                                                                             | 37.3                | 0.5   | 15.1                 | 6.9                  | 6.8                  |
| KH <sub>2</sub> PO <sub>4</sub>                                                                 | 68                  | 0.5   | 3.7                  | 0.9                  | 0.8                  |
| NaHCO <sub>3</sub>                                                                              | 84                  | 1     | 13.6                 | 25                   | 85                   |
| NaCl                                                                                            | 117                 | 2     | -                    | 47.2                 | 38.4                 |
| MgCl <sub>2</sub> (H <sub>2</sub> O) <sub>6</sub>                                               | 30.5                | 0.15  | 0.15                 | 0.1                  | 0.33                 |
| (NH <sub>4</sub> ) <sub>2</sub> CO <sub>3</sub>                                                 | 48                  | 0.5   | 0.06                 | 0.5                  | -                    |
| NaOH                                                                                            | -                   | 1     | -                    | -                    | 8.4                  |
| HCl                                                                                             | -                   | 6     | 1.1                  | 15.6                 | -                    |
| CaCl <sub>2</sub> (H <sub>2</sub> O) <sub>2</sub>                                               | 44.1                | 0.3   | (0.75)               | (0.075)              | (0.3)                |
| SSF- stimulated salivary fluid; SGF- stimulated gastric fluid; SIF- stimulated intestinal fluid |                     |       |                      |                      |                      |
